# Supplementary material
Source: publisher site journal article supplement (https://www.dovepress.com/article/378970)
Supplement: Supplementary file 1 [file get_supplementary_file.php]

Table supplement 1 Comparison of severity and impact of RLS between patients with and without a ferritin concentration < 50 µg/L

| **Variable** | **Ferritin < 50 µg/L (n=32)** | **Ferritin ≥ 50 µg/L (n=76)** | ***χ2/t/z* value** | ***P-*value** |
| --- | --- | --- | --- | --- |
| IRLS total score, median (IQR) | 19.5(15–26) | 24.5(19–28) | −1.681 | 0.093 |
| Symptom severity, median (IQR) | 14.5(9.25–18) | 17(12.25–20) | −1.882 | 0.060 |
| Symptom impact, median (IQR) | 4(3–6) | 4(2.25–7) | −0.193 | 0.847 |
| RLS diagnosis, median (IQR) | 2(2–3) | 3(2–3) | −1.380 | 0.168 |
| PSQI global scores, median (IQR) | 11.5(7.25–15) | 12(8–14) | −0.226 | 0.821 |
| Sleep quality, median (IQR) | 2(2–2.75) | 2(1–3) | −0.094 | 0.925 |
| Sleep latency, median (IQR) | 2.5(1–3) | 2(1–3) | −0.561 | 0.575 |
| Sleep duration, median (IQR) | 2(1–2.75) | 2(1–3) | −0.708 | 0.479 |
| Sleep efficiency, median (IQR) | 3(1–3) | 3(1–3) | −0.029 | 0.977 |
| Sleep disturbances, median (IQR) | 1(1–2) | 1(1–2) | −0.609 | 0.542 |
| Use of sleep medications, median (IQR) | 0(0–0) | 0(0–0) | −0.806 | 0.420 |
| Daytime dysfunction, median (IQR) | 2(1–3) | 1(1–2) | −1.348 | 0.178 |
| ESS, mean ± SD | 9.69±5.15 | 9.33±4.98 | 0.338 | 0.736 |
| CFS, median (IQR) | 20.5(16–25) | 20(16–25) | −0.142 | 0.887 |
| SF-36 total score, mean ± SD | 70.31±12.42 | 68.76±14.46 | 0.530 | 0.597 |
| Physical Functioning, median (IQR) | 92.5(80–95) | 85(75–95) | −1.262 | 0.207 |
| Role-Physical, median (IQR) | 100(56.25–100) | 100(25–100) | −1.530 | 0.126 |
| Bodily Pain, median (IQR) | 73(62–100) | 82(62–100) | −0.957 | 0.338 |
| General Health, mean ± SD | 51.97±24.36 | 48.53±21.24 | 0.736 | 0.463 |
| Vitality, median (IQR) | 70(60–83.75) | 77.5(60–85) | −0.694 | 0.488 |
| Social Functioning, median (IQR) | 87.5(75–100) | 87.5(75–100) | −0.441 | 0.659 |
| Role-Emotional, median (IQR) | 100(66.68–100) | 100(33.3–100) | −0.068 | 0.945 |
| Mental Health, median (IQR) | 66(52–79) | 70(56–84) | −0.604 | 0.546 |
| Health Transition, median (IQR) | 37.5(25–50) | 25(25–50) | −1.691 | 0.091 |
| BDI-13, median (IQR) | 2(1–5) | 2(1–6) | −0.319 | 0.749 |
| BAI, median (IQR) | 29.5(27.25–34) | 29(27–34.75) | −0.617 | 0.537 |
| MoCA, *n*（%） | 25(78.1) | 45(59.2) | 3.533 | 0.060 |
| MoCA total score, median (IQR) | 26(24–28) | 25(22.5–27) | −1.769 | 0.077 |
| Visual/executive, median (IQR) | 5(3–5) | 4(3–5) | −1.375 | 0.169 |
| Naming, median (IQR) | 3(3–3) | 3(3–3) | −0.562 | 0.574 |
| Attending, median (IQR) | 6(5.5–6) | 6(5–6) | −0.942 | 0.346 |
| Language, median (IQR) | 2(2–3) | 2(1.5–3) | −0.842 | 0.400 |
| Abstraction, median (IQR) | 2(1–2) | 2(1–2) | −0.593 | 0.553 |
| Recall, median (IQR) | 3(2–4) | 3(1–3) | −2.009 | **0.045** |
| Orientation, median (IQR) | 6(5.5–6) | 6(6–6) | −0.619 | 0.536 |
| MMSE, *n*（%） | 7(21.9) | 31(40.8) | 3.533 | 0.060 |
| MMSE total score*　, median (IQR) | 28(23–29) | 28(23–30) | −0.590 | 0.555 |
| **Notes:** *MMSE total score was adjusted for education years. Significant results (*P* < 0.05) are shown in boldface. | | | | | |
| **Abbreviations:** IRLS, International restless legs syndrome study group (IRLSSG) severity scale (IRLS); PSQI, the Pittsburg Sleep Quality Index; ESS, Epworth Sleeping Scale; CFS, Chalder Fatigue Scale; SF-36, the MOS 36-item short-form health survey; BDI, Beck Depression Inventory; BAI, Beck Anxiety Inventory; MoCA (Montreal cognitive assessment); MMSE, (Mini-mental State Examination); SD, standard deviation; IQR, interquartile range. | | | | | |
